# Supplementary material for: Anti-angiogenic vanadium pentoxide nanoparticles for the treatment of melanoma and their in vivo toxicity study
Source: Royal Society of Chemistry journal article supplement (doi:10.1039/d0nr00631a), 2020-01-01
Supplement: d0nr00631a1.pdf [file d0nr00631a1.pdf]

## Supporting Information

### Anti-angiogenic vanadium pentoxide nanoparticles for the treatment of melanoma and their *in vivo* toxicity study

Sourav Das<sup>a#</sup>, Arpita Roy<sup>a#</sup>, Ayan Kumar Barui<sup>a#</sup>, Muntadher Mazin Abdulkareem Alabbasi<sup>a</sup>, Madhusudan Kuncha<sup>a</sup>, Ramakrishna Sistla<sup>a#</sup>, Sreedhar Bojja<sup>b#</sup>, Chitta Ranjan Patra<sup>a#\*</sup>

<sup>a</sup>Department of Applied Biology, CSIR-Indian Institute of Chemical Technology, Uppal Road, Tarnaka, Hyderabad - 500007, Telangana State, India.

<sup>b</sup>Analytical Division, CSIR-Indian Institute of Chemical Technology, Uppal Road, Tarnaka, Hyderabad - 500007, Telangana State, India.

<sup>#</sup>Academy of Scientific and Innovative Research (AcSIR), Gaziabad-201002, U.P, India

#### Corresponding author

\*Chitta Ranjan Patra, PhD

Department of Applied Biology, CSIR-Indian Institute of Chemical Technology, Uppal Road, Tarnaka, Hyderabad - 500007, India

Tel: +91-40-27191855; Fax: +91-40-27160387

**E-mail:** crpatra@iict.res.in; patra.chitta@gmail.com

#### Experimental:

##### *1. X-ray diffraction (XRD) spectroscopy*

The phase purity and crystallinity of V<sub>2</sub>O<sub>5</sub> NPs was analyzed by X-ray diffraction (XRD) analysis [Bruker AXS D8 Advance Powder X-ray diffractometer (using CuK $\alpha$  $\lambda$ =1.5406 Å radiation) in range  $2\theta = 20$  to  $80^\circ$ ].

##### *2. Fourier transformed infrared (FTIR) spectroscopy*

Fourier transformed infrared spectroscopy (FTIR: Thermo Nicolet Nexus 670 spectrometer) was utilized to determine the functional groups present in  $V_2O_5$  NPs. The FT-IR spectra was performed at a resolution of  $4\text{ cm}^{-1}$  in KBr pellet from range  $400\text{-}4000\text{ cm}^{-1}$ .

### *3. Dynamic light scattering (DLS)*

The size, shape and surface charge of as-synthesized  $V_2O_5$  NPs was determined by dynamic light scattering (Malvern). In order to check the hydrodynamic diameter,  $20\ \mu\text{L}$  of NPs solution was diluted in total  $1\text{ mL}$  of milli-Q water and used in DLS measurement.

### *4. Transmission electron microscopy (TEM)*

The morphology and shape of  $V_2O_5$  NPs was observed using the TEM (TEM: Tecnai G2 F30 S-Twin Microscope, operated at  $100\text{ kV}$ ). The NPs solution in water was drop casted on the carbon-coated copper grid and allowed to dry in room temperature. This process was repeated for more than two times to coat it properly on the grid and subsequent analysis was carried out.

### *5. X-ray photoelectron spectroscopy (XPS)*

In order to know the elemental composition in the  $V_2O_5$  NPs XPS analysis [KRATOS AXIS 165 with a dual anode (Mg and Al) apparatus using the Mg  $K\alpha$  anode] was performed.

### *6. Inductive coupled plasma optical emission spectroscopy (ICP-OES)*

In order to know the uptake as well as clearance of vanadium from the cells and *in vivo* system; respectively, ICP-OES analysis [(IRIS intrepid II XDL, ThermoJarrel Ash) was carried out.

## FIGURES

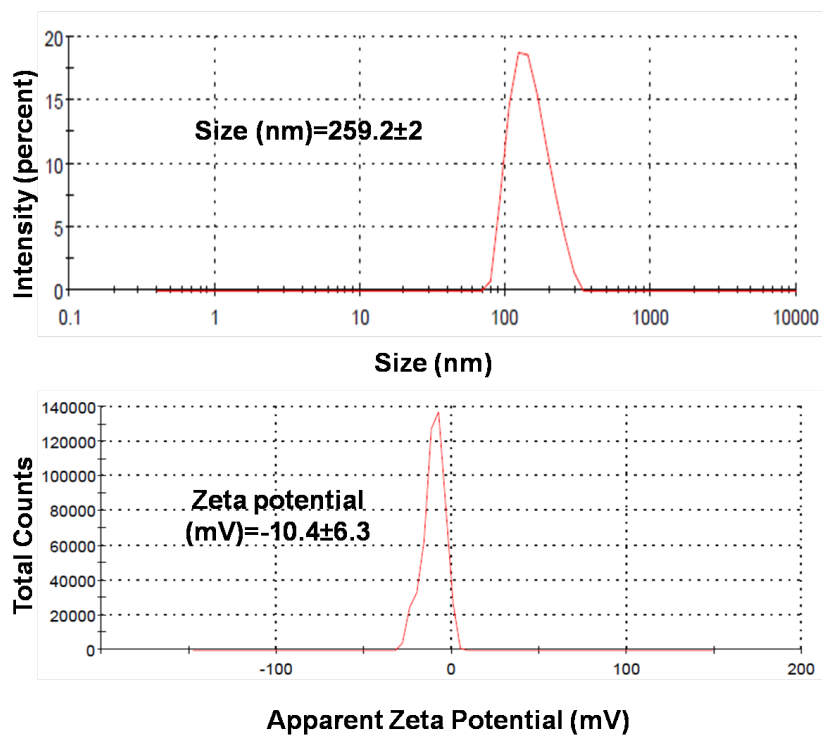

**Figure S1:** (a) size, and (b) zeta potential of the as synthesized  $V_2O_5$  NPs measured by DLS.

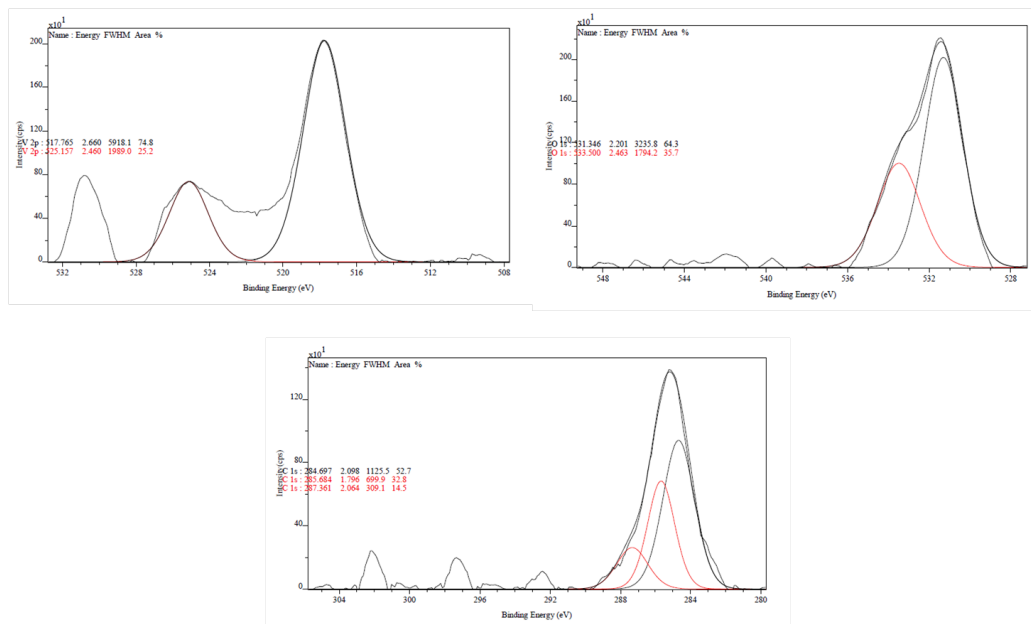

**Figure S2:** Different binding energy curves obtained from XPS analysis of the as synthesized  $V_2O_5$  NPs.

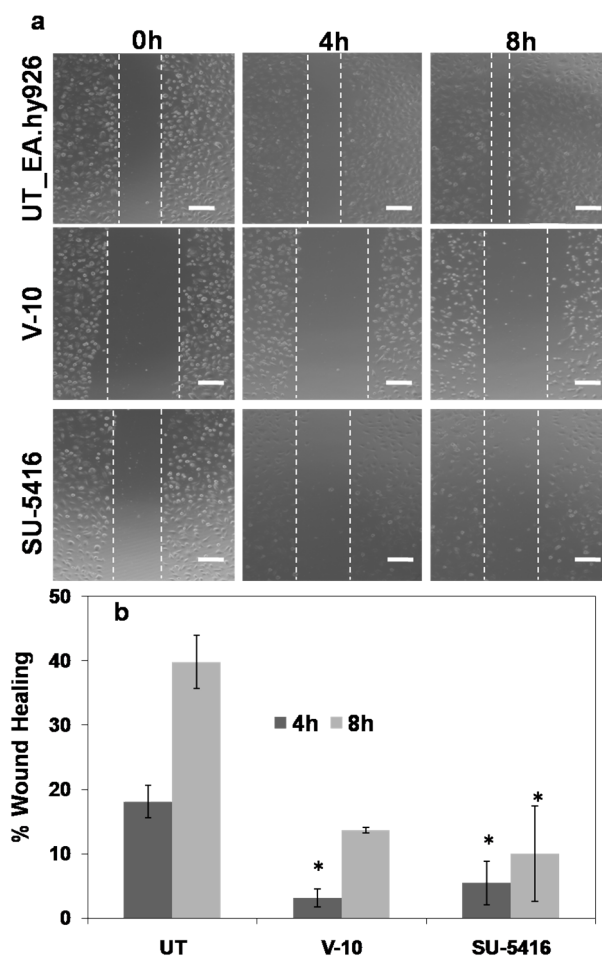

**Figure S3:** (a) Scratch wound healing assay in EA.hy926 within 0-8 h time points. The migration of cells was inhibited by V<sub>2</sub>O<sub>5</sub> NPs (10  $\mu$ g/mL: V-10) in a dose dependent fashion. (b) Histogram representation of the healing of the scratch area quantified using Image J software. These experiments were performed thrice and represented as mean $\pm$ SD. Significant differences from untreated (UT) cells were observed (\* $p$  < 0.05). Scale bar=100  $\mu$ m.

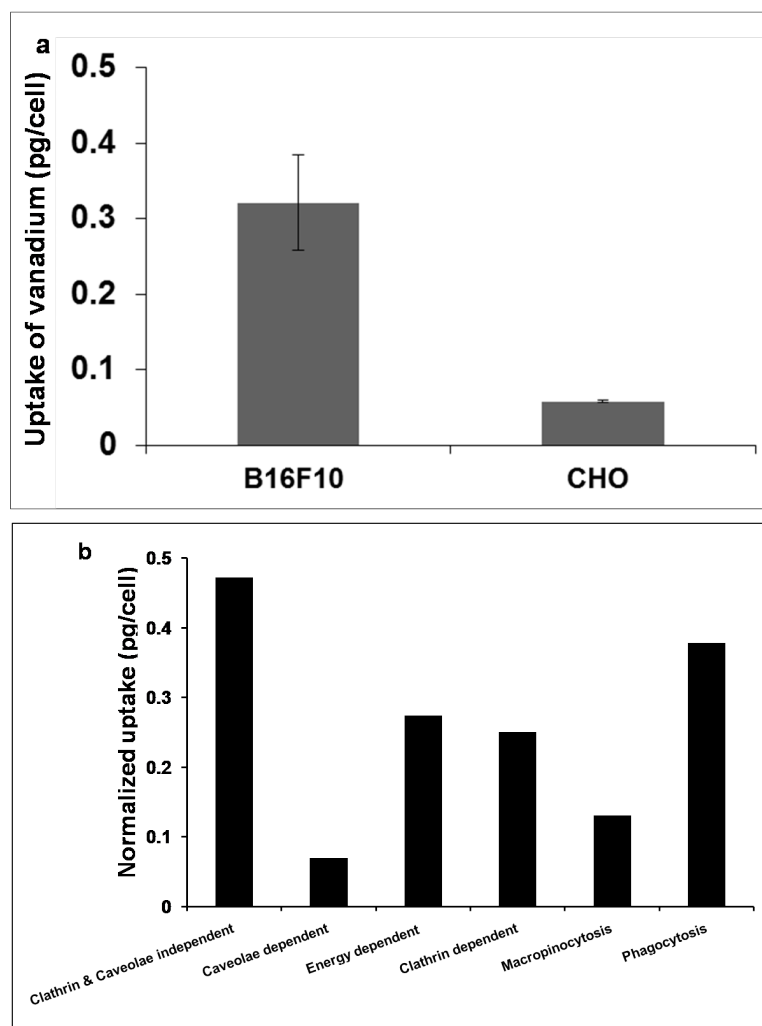

**Figure S4:** (a) Uptake variation of  $V_2O_5$  NPs in terms of vanadium metal in cancer cell (B16F10) with respect to normal cell (CHO), measured using ICP-OES analysis. These experiments were performed thrice with similar results and no significant differences was observed ( $*p < 0.05$ ). (b) Intracellular uptake pathway analysis of  $V_2O_5$  NPs inside B16F10 cells under different endocytosis-inhibited conditions. Before 6 h incubation with  $V_2O_5$  NPs ( $10 \mu\text{g/mL}$ ) cells were incubated with specific endocytosis inhibitors, see the Experimental section for details. Data was represented as normalized uptake (pg/cell). It was a pulled from two independent experiment, so no statistical significance was provided.

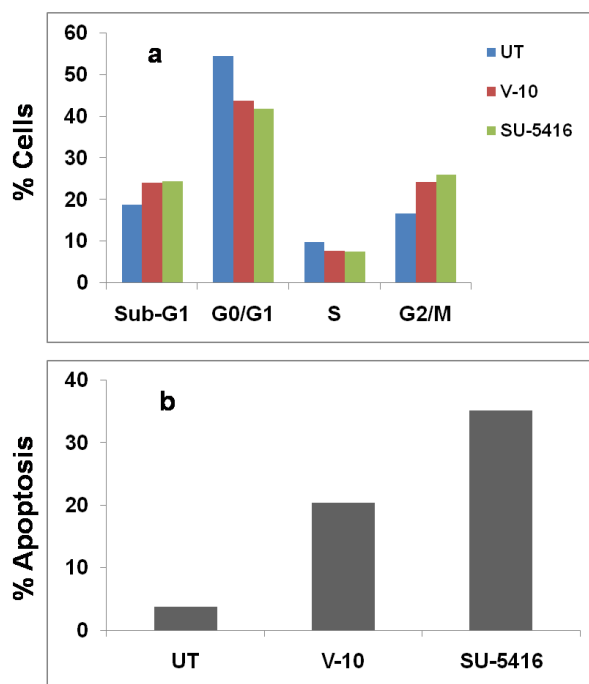

**Figure S5:** Histogram of (a) cell cycle and (b) apoptosis studies after various treatments [UT, V-10 ( $V_2O_5$  NPs:  $10 \mu\text{g/mL}$ ), SU-5416]. B16F10 cells underwent G2/M phase arrest followed by apoptosis in late apoptotic region upon treatment with  $V_2O_5$  NPs.

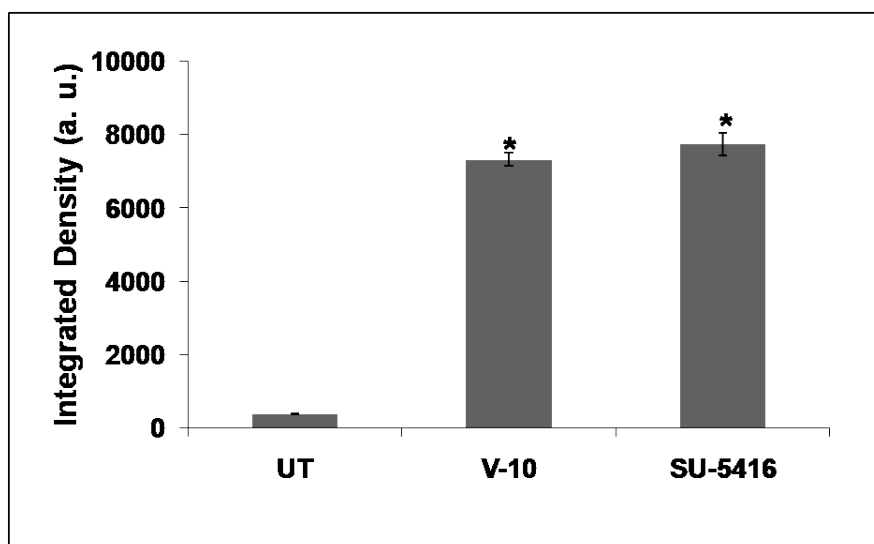

**Figure S6:** Quantification of the fluorescence intensity inside the cells corresponds to Fig. 10. These quantification were performed thrice and represented as mean $\pm$ SD. Significant differences from UT cells were observed (\* $p < 0.05$ ).

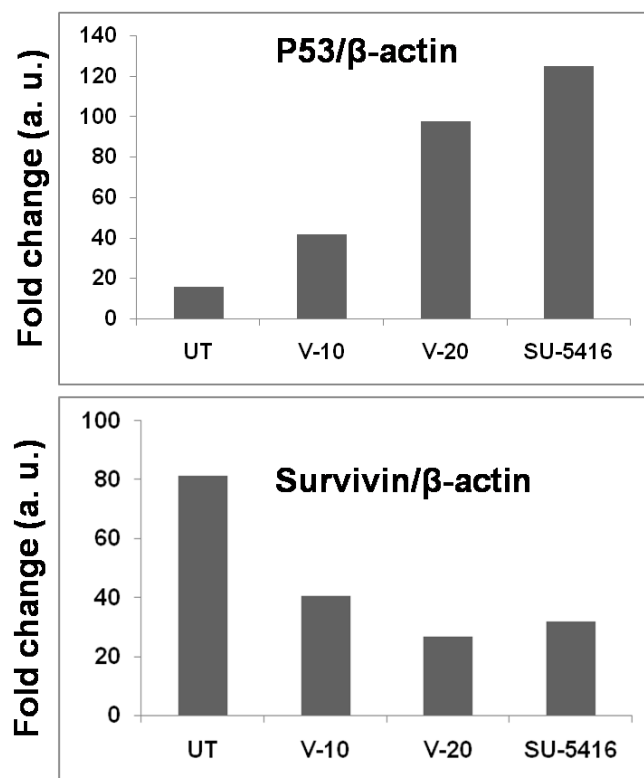

**Figure S7:** Quantification of the western blots data are represented as fold change vs treatments (UT, V-10, V-20, SU-5416). Beta actin was used as loading control. Upregulation of p53 expression and downregulation of survivin was observed in treatments compared to UT.



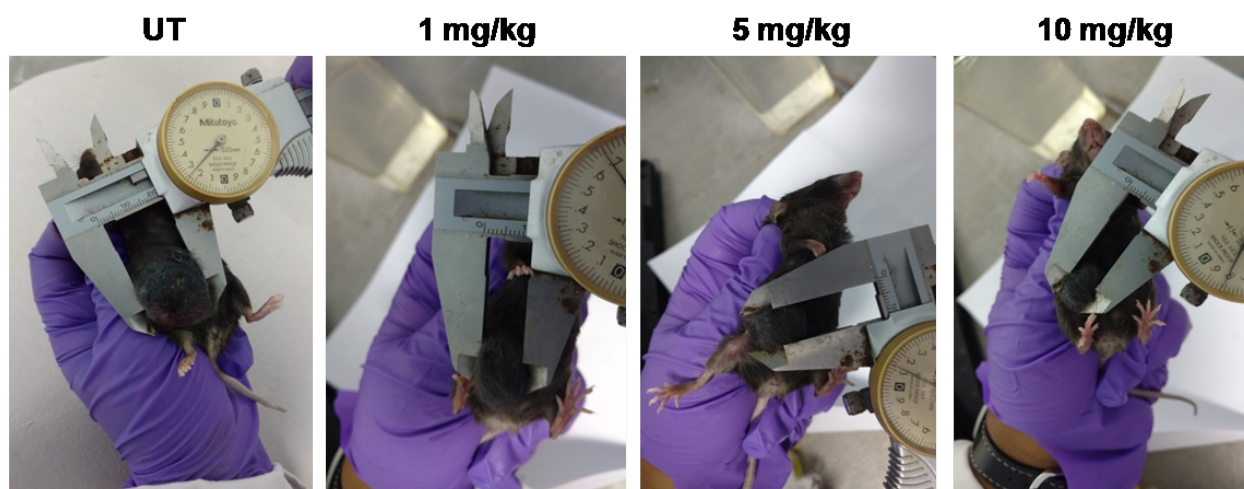

**Representative image of tumor bearing mice**

**Figure S8:** The representative images of tumor bearing mice of various groups (untreated (UT),  $V_2O_5$  NPs: 1 mg/kg b.w,  $V_2O_5$  NPs: 5 mg/kg b.w and  $V_2O_5$  NPs: 10 mg/kg b.w).

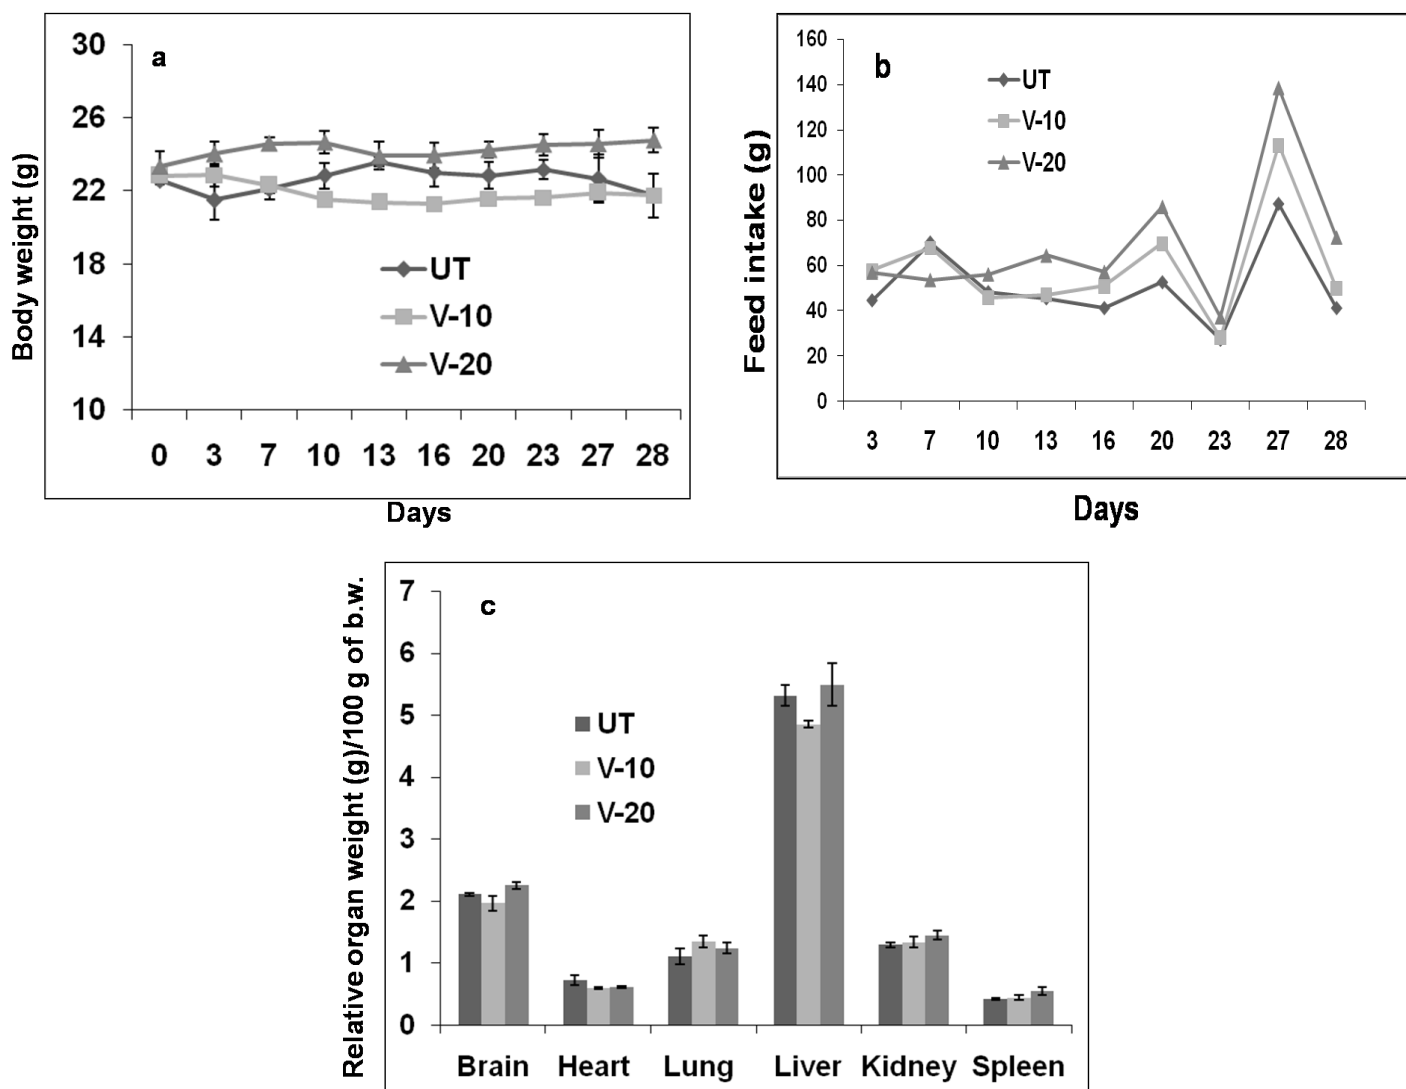

**Figure S9:** (a) Body weight data of mice after sub-chronic toxicity study. (b) Feed intake data of mice after sub-chronic toxicity study period. (c) Organ index of mice after sub-chronic toxicity study. Groups: UT, V-10 ( $V_2O_5$  NPs: 10 mg/kg b.w), V-20 ( $V_2O_5$  NPs: 20 mg/kg b.w). No significant difference in treated mice with respect to UT was observed with respect to body weight, feed intake or organ weight.

| Pathways                             | Inhibitor name                  | Dose     | Pre-incubation time |
|--------------------------------------|---------------------------------|----------|---------------------|
| Energy dependent                     | NaN <sub>3</sub> (sodium azide) | 0.1 %    | 1 h                 |
| Phagocytosis                         | Wortmanin                       | 10 nM    | 1 h                 |
| Clathrin and<br>caveloae independent | Monensin                        | 30 µg/mL | 30 min              |
| Macropinocytosis                     | Amiloride                       | 50 µM    | 30 min              |
| Clathrin dependent                   | Chlorpromazine hydrochloride    | 10 µg/mL | 15 min              |
| Caveloae dependent                   | Methyl-β cyclodextrin           | 5 mM     | 15 min              |

**Table S1:** Cellular uptake pathway study of V<sub>2</sub>O<sub>5</sub> NPs using various inhibitors.
